# Supplementary material
Source: PubMed Central journal article supplement (PMC3928135)
Supplement: cbt-15-194-s01.pdf [file cbt-15-194-s01.pdf]

## **Supplemental Material to:**

**Anna Budina-Kolomets, Gregor M Balaburski,  
Anastasia Bondar, Neil Beeharry, Tim Yen,  
and Maureen E Murphy**

**Comparison of the activity of three different HSP70  
inhibitors on apoptosis, cell cycle arrest, autophagy  
inhibition, and HSP90 inhibition**

**Cancer Biology & Therapy 2014; 15(2)**

**<http://dx.doi.org/10.4161/cbt.26720>**

**<http://www.landesbioscience.com/journals/cbt/article/26720/>**

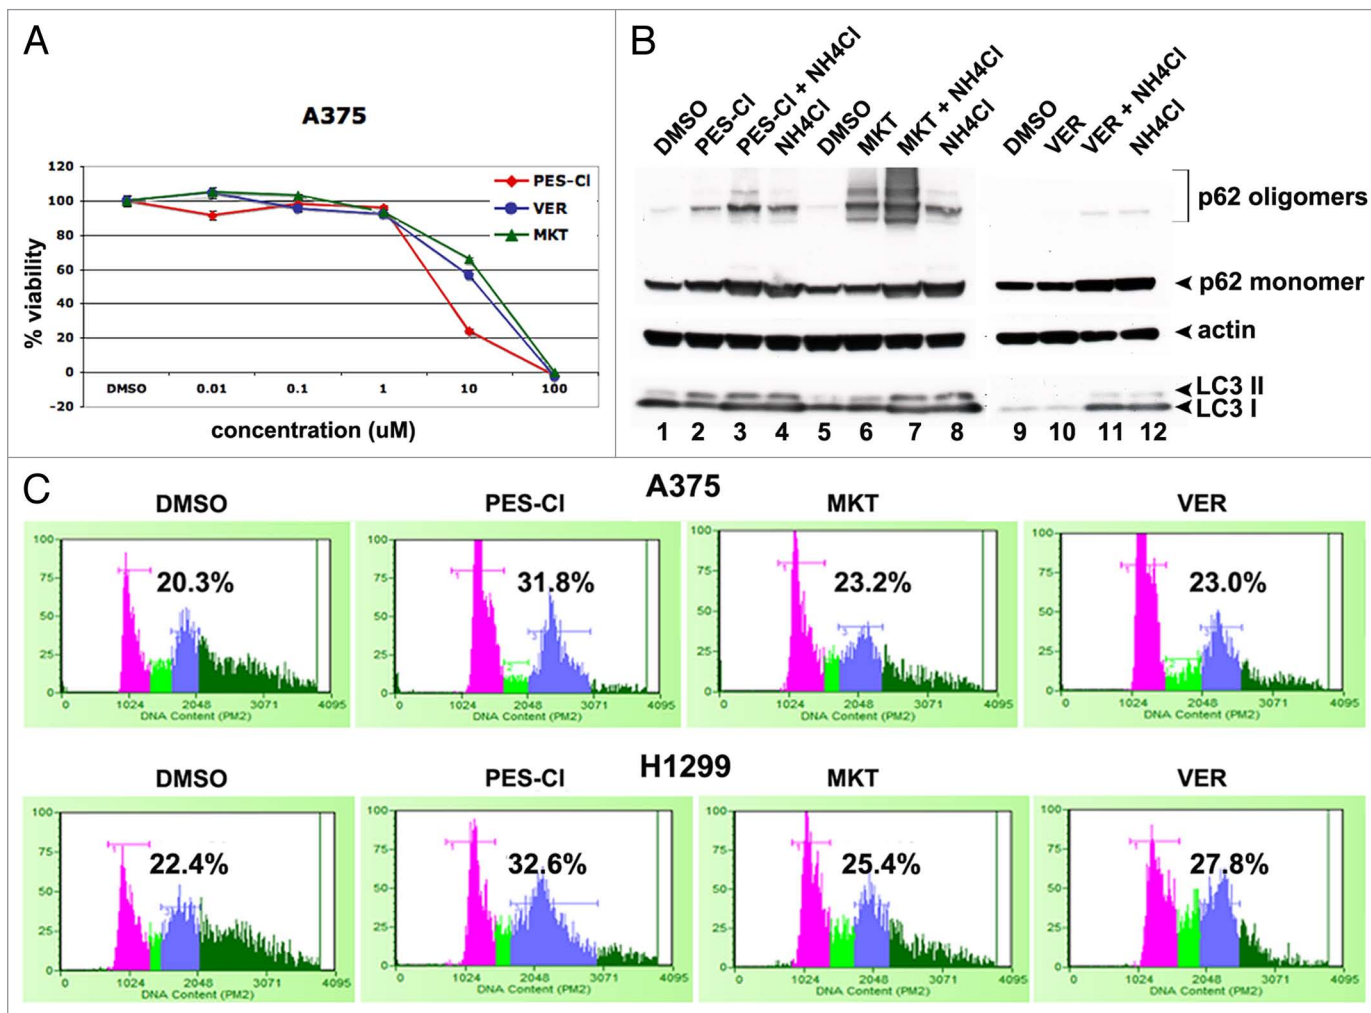

**Figure S1.** (A) Cell viability analysis of A375 cells treated with 10 uM PES-Cl or MKT-077, or 20 uM VER-155008 for 24 h. Cell viability was assessed using the Guava flow cytometer and the ViaCount assay reagent. (B) Western blot analysis of H1299 cells treated with DMSO, PES-Cl (10 uM), MKT-077 (10 uM), or VER-155008 (20 uM) for 24 h, in the presence and absence of 10 mM NH<sub>4</sub>Cl to halt autophagic flux. LC3 I and II, and p62 monomer and oligomers, are indicated. (C) Propidium iodide cell cycle profiles of A375 cells treated with 10 uM PES-Cl or MKT-077, or 20 uM VER-155008 for 24 h. Following propidium iodide staining, cells were analyzed on a Guava EasyCyte flow cytometer. Numbers in brackets represent G<sub>2</sub>/M (4n) populations; the data depicted are representative of 3 independent experiments.
